# Supplementary material for: Ternary donor–acceptor phosphine oxide hosts with peculiar high energy gap for efficient blue electroluminescence
Source: Royal Society of Chemistry journal article supplement (doi:10.1039/c5tc02029h), 2015-01-01
Supplement: c5tc02029h2.pdf [file c5tc02029h2.pdf]

## Supporting Information

### Ternary Donor-Acceptor Hosts for Highly Efficient Blue Phosphorescence and Thermally Activated Delayed Fluorescence OLEDs

Mingzhi Sun,<sup>a</sup> Liping Zhu,<sup>b</sup> WenJing Kan,<sup>a</sup> Ying Wei,<sup>a,c</sup> Dongge Ma,<sup>\*b</sup> Xuefeng Fan,<sup>a</sup> Wei Huang<sup>\*c</sup> and Hui Xu,<sup>\*a,c</sup>

<sup>a</sup> Key Laboratory of Functional Inorganic Material Chemistry, Ministry of Education, and School of Chemistry and Material Science, HeilongJiang University, 74 Xuefu Road, Harbin 150080, P. R. China

<sup>b</sup> State Key Laboratory of Polymer Physics and Chemistry, Changchun Institute of Applied Chemistry, Chinese Academy of Sciences, 5625 People's Street, Changchun 130022, P. R. China

<sup>c</sup> Institute of Advanced Materials, Nanjing Tech University (NJTech), 5 Xinmofan Road, Nanjing 210009, P.R. China

## Content

|                                                                             |   |
|-----------------------------------------------------------------------------|---|
| Thermal Properties .....                                                    | 2 |
| Solvent Effect on FL Emissions of PCImG .....                               | 3 |
| Optical Properties in Film .....                                            | 4 |
| Emission and Time-Decay Spectra of Thin Films of Firpic-Doped PCImG .....   | 5 |
| DFT Calculation Results of PCImG .....                                      | 6 |
| DFT Calculation Results of D-A-D and D-A-A type PCImG Analogues .....       | 7 |
| Device Configuration and Energy Level Diagram .....                         | 8 |
| Table S1. EL performance of blue OLEDs based on PCImG and <i>m</i> CP. .... | 9 |

## Thermal Properties

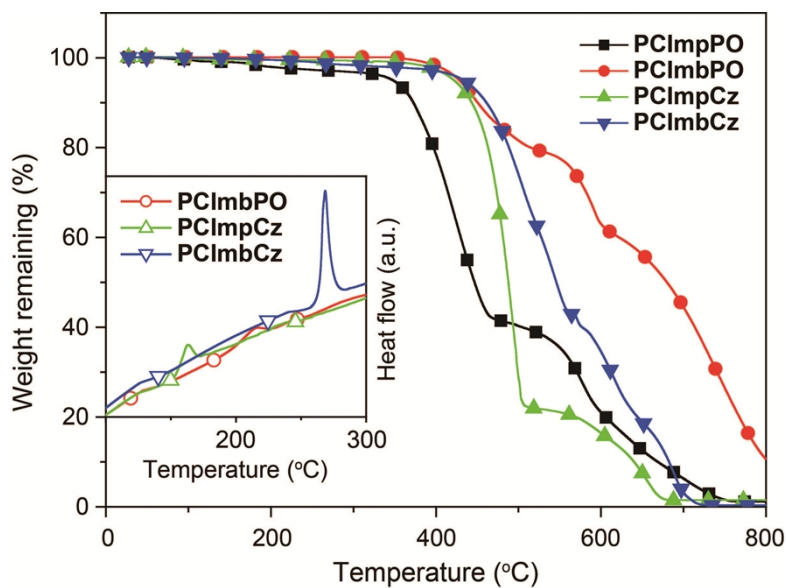

**Figure S1.** TGA and DSC curves of PCImG.

TGA curve of PCImpPO showed two intermediate decomposition stages with weight losses of 24 and 13%, corresponding to two phenyls in DPPO group and one phenyl at 9-position of carbazole group, respectively, which should be ascribed to the large steric hindrance effect between DPPO and N-phenylcarbazole as peripheral groups in PCImpPO.

## Solvent Effect on FL Emissions of PCImG

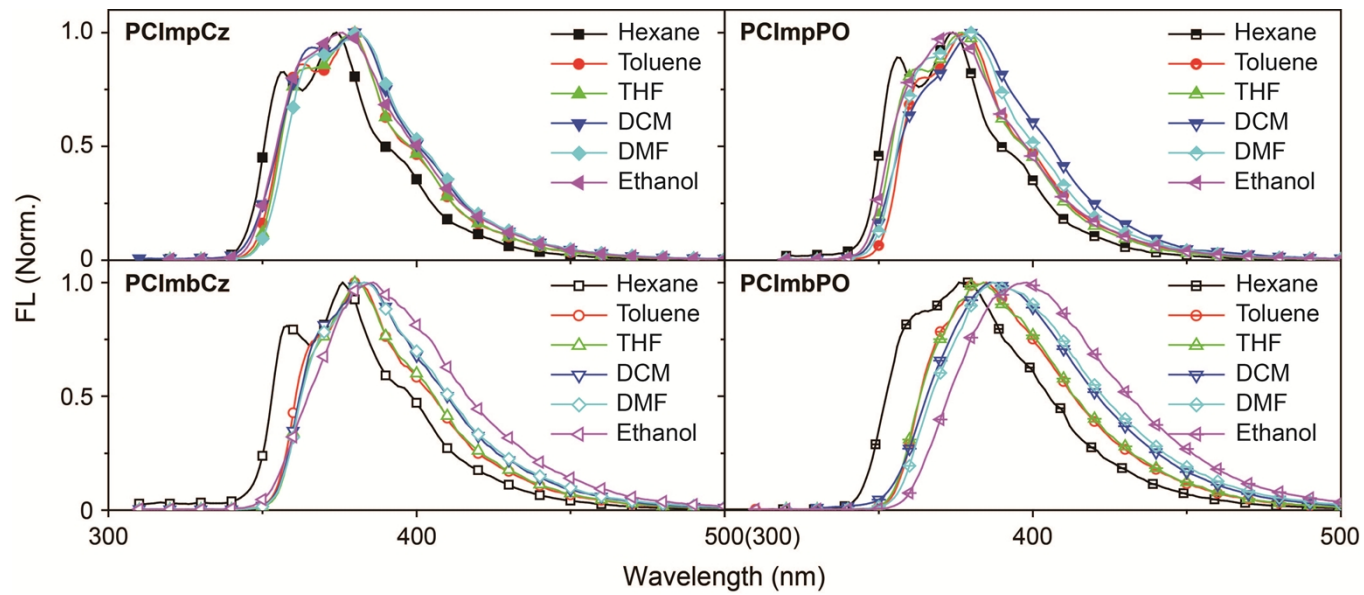

Figure S2. FL spectra of PCImG in solvents with different polarities.

## Optical Properties in Film

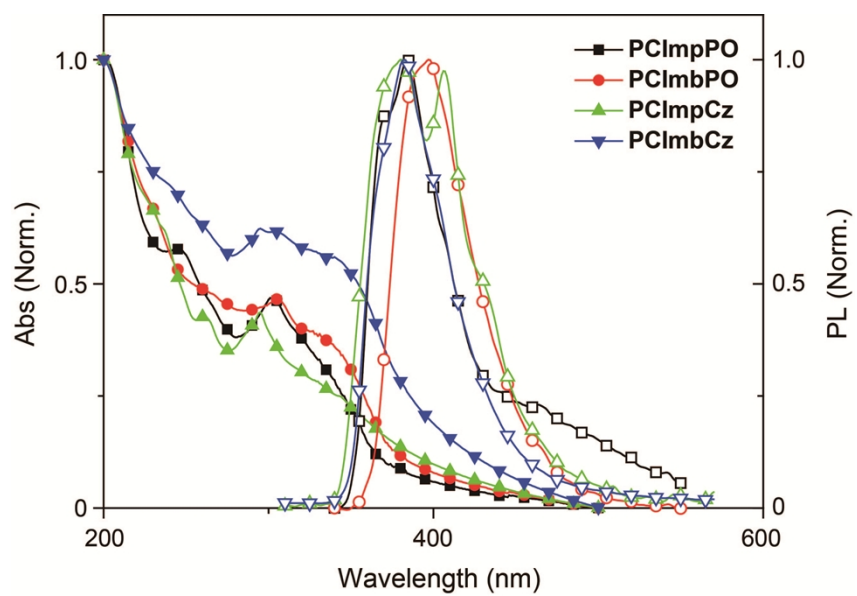

**Figure S3.** Absorption and PL spectra of **PCImG** in thin film.

## Emission and Time-Decay Spectra of Thin Films of Flrpic-Doped PCImG

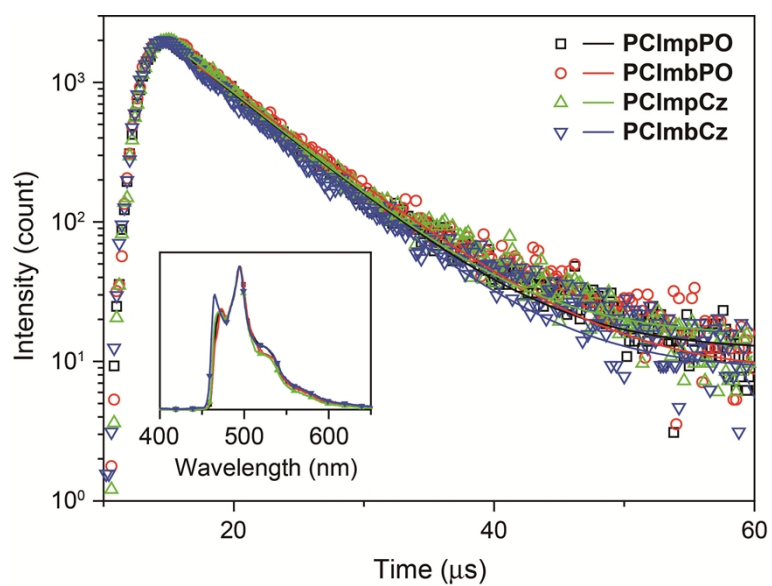

**Figure S4.** Decay curves and emission spectra (inset) of Flrpic doped (10%) PCImG thin films.

The photoluminescence spectra of the doped films consist of three typical Flrpic-originated peaks around 470, 500 and 530 nm, corresponding to its 0-0, 0-1 and 0-2 vibronic bands, respectively.

## DFT Calculation Results of PCImG

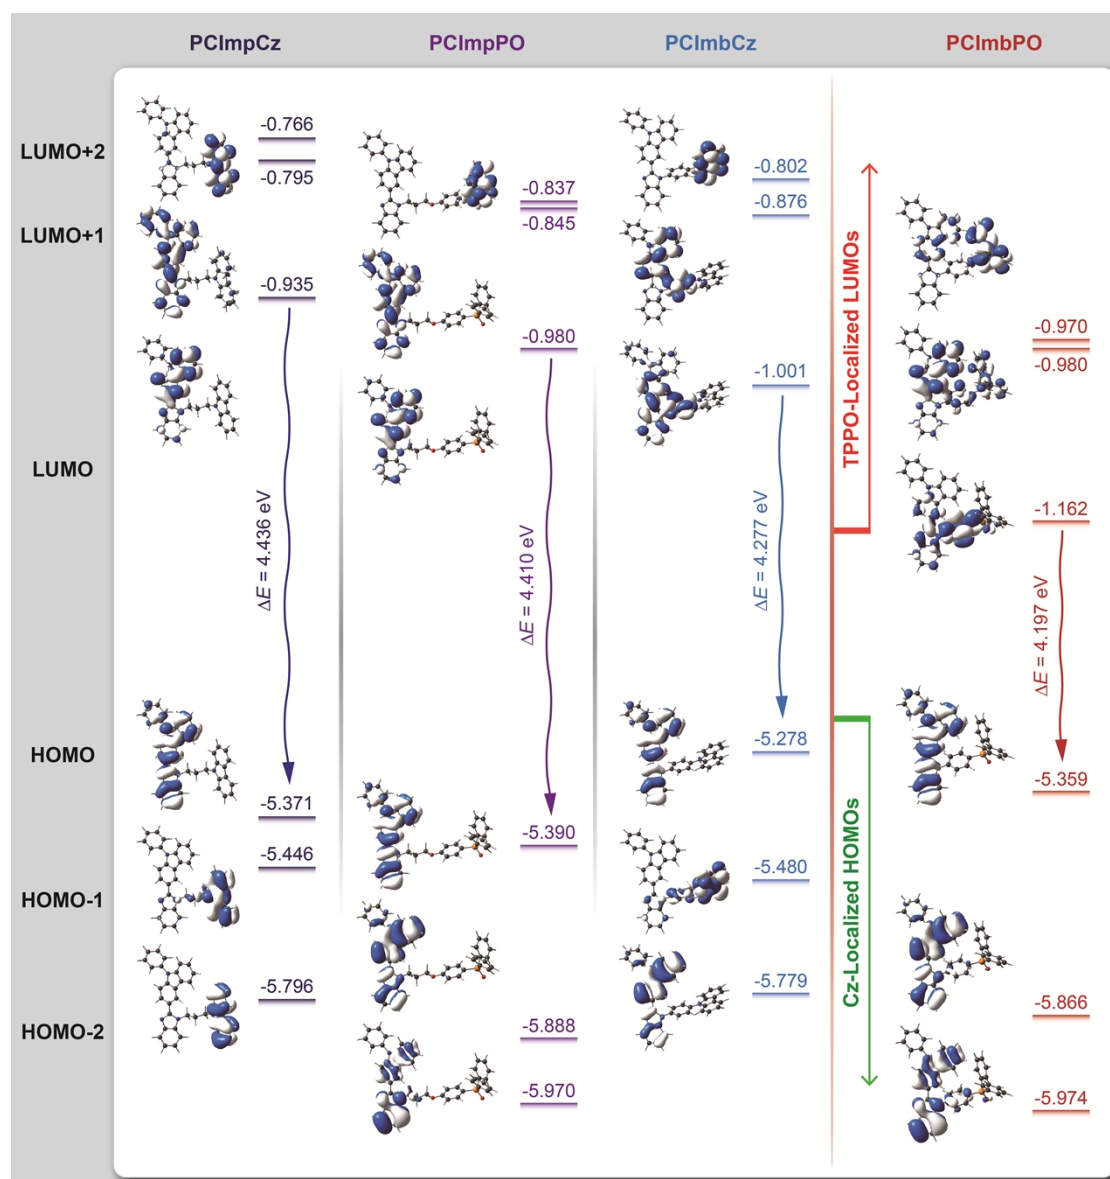

**Figure S5.** Energy level scheme and contours of frontier molecular orbitals of **PCImG** according to DFT calculation.

## DFT Calculation Results of D-A-D and D-A-A type PCImG Analogues

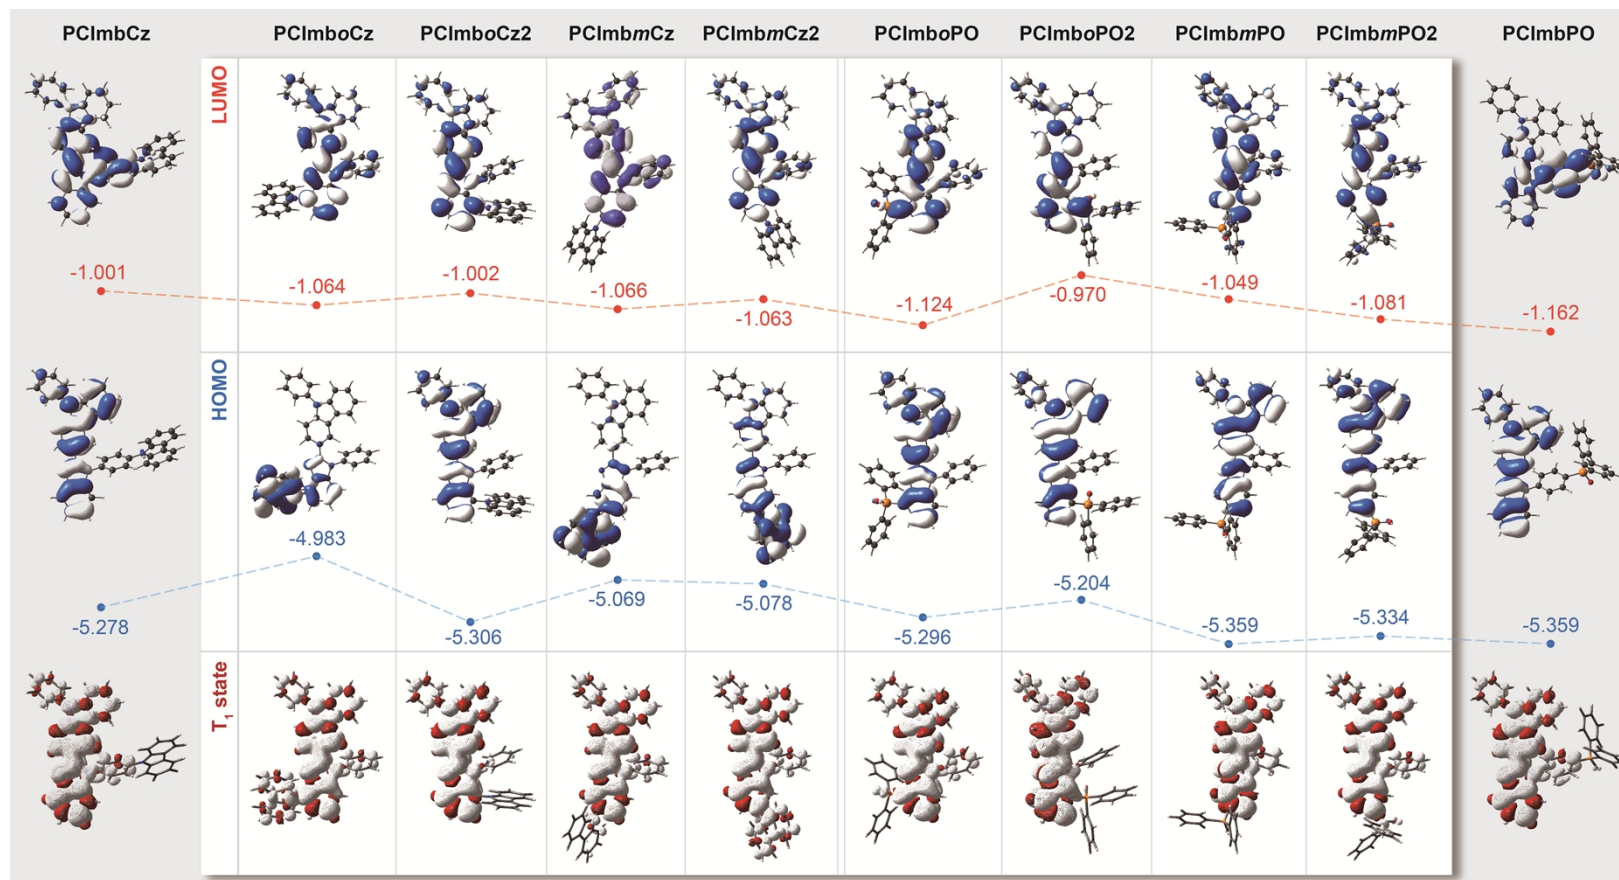

**Figure S6.** DFT-calculated energy level and contours of FMOs of schemes of D-A-D and D-A-A type PCImG analogs.

## Device Configuration and Energy Level Diagram

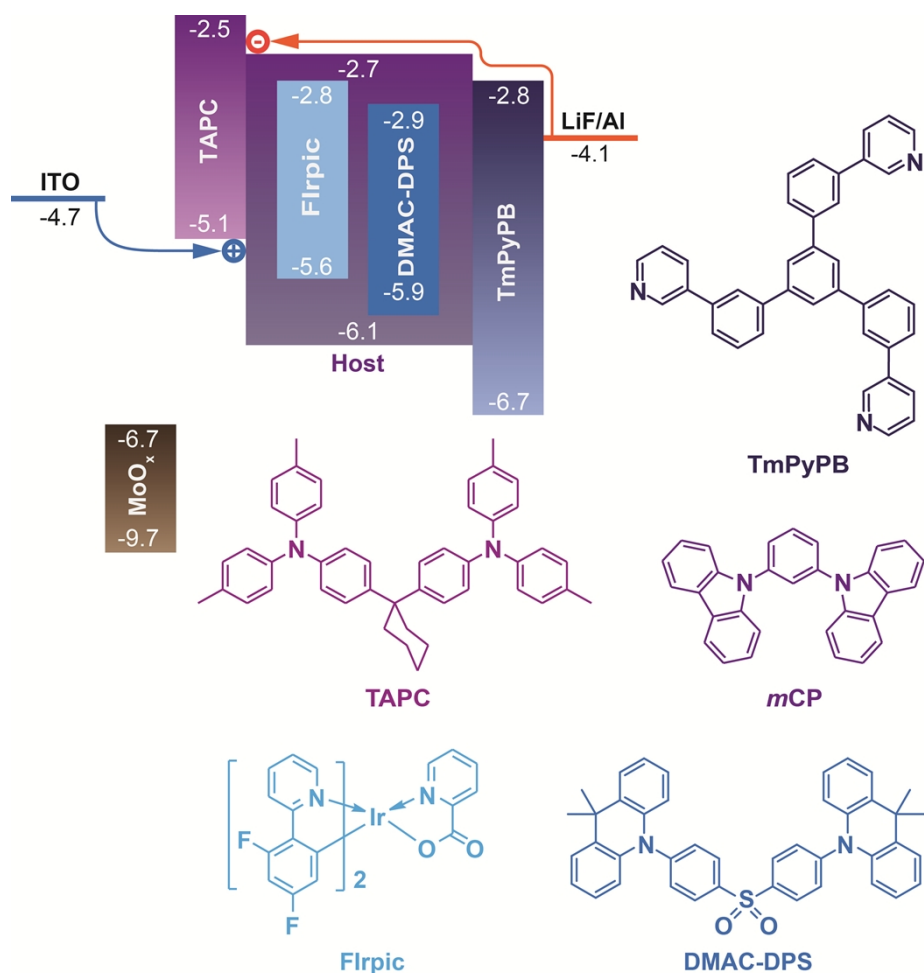

**Scheme S1.** Energy level diagram of blue PHOLEDs and TADF diodes based on PCImG and chemical structures of auxiliary materials.

Since the HOMO energy gap between TAPC and PCImbPO as 1.0 eV is ten times of the LUMO energy gap between TmPyPB and PCImbPO as 0.1 eV, and PCImbPO reveals the feature of electron-transporting predominance with electron-only  $J$  remarkably higher than hole-only  $J$  of its single-carrier transporting devices, it is rational that as the host matrix in EML, the superiority of PCImbPO in electron injection and transportation would render the charge recombination zone close to the interface between TAPC and EML.



**Table S1.** EL performance of blue OLEDs based on **PCImG** and *mCP*.

| Device    | Operating Voltage (V) <sup>a</sup> | Maximum Efficiencies <sup>b</sup> | Efficiency Roll-Offs (%) <sup>c</sup> |        |        |
|-----------|------------------------------------|-----------------------------------|---------------------------------------|--------|--------|
|           |                                    |                                   | C.E.                                  | P.E.   | E.Q.E. |
| <b>PA</b> | 3.5, <5.5, <7.5                    | 33.7, 30.2, 16.2                  | 10, 20                                | 43, 63 | 10, 19 |
| <b>PB</b> | 3.0, <5.0, <6.5                    | 46.9, 49.1, 22.5                  | 5, 10                                 | 43, 58 | 5, 10  |
| <b>PC</b> | 3.0, <5.0, <7.0                    | 17.3, 18.1, 8.3                   | 23, 36                                | 54, 73 | 23, 36 |
| <b>PD</b> | 3.5, <5.0, <7.0                    | 36.4, 38.1, 17.5                  | 8, 19                                 | 45, 65 | 8, 18  |
| <b>PE</b> | 3.5, <5.0, <7.0                    | 29.8, 26.7, 14.3                  | 8, 13                                 | 36, 53 | 8, 13  |
| <b>FA</b> | 3.7, <5.9, <10.4                   | 12.4, 10.3, 6.1                   | 19, 69                                | 49, 89 | 18, 69 |
| <b>FB</b> | 3.6, <5.1, <7.2                    | 24.2, 21.0, 12.2                  | 6, 28                                 | 33, 64 | 6, 28  |
| <b>FC</b> | 3.7, <5.8, <9.7                    | 8.9, 7.2, 4.5                     | 18, 70                                | 44, 88 | 18, 69 |
| <b>FD</b> | 3.6, <5.6, <7.7                    | 18.8, 16.0, 9.4                   | 14, 46                                | 41, 74 | 14, 46 |
| <b>FE</b> | 3.9, <5.6, <8.6                    | 12.2, 9.9, 6.1                    | 12, 52                                | 39, 79 | 13, 52 |

<sup>a</sup> In the order of onset, 100 and 1000 cd m<sup>-2</sup>; <sup>b</sup> in the order of C.E. (cd A<sup>-1</sup>), P.E. (lm W<sup>-1</sup>) and E.Q.E. (%); <sup>c</sup> in the order of 100 and 1000 cd m<sup>-2</sup>.
